# Supplementary material for: Simultaneous RNA purification and size selection using on-chip isotachophoresis with an ionic spacer
Source: Royal Society of Chemistry journal article supplement (doi:10.1039/c9lc00311h), 2019-01-01
Supplement: c9lc00311h3.xlsx [file c9lc00311h3.xlsx]

## Sheet: Sheet1
Outlier Gene IDs (Gel-high)
STRADB
BCL7C
SPR
ZBTB46
FDXACB1
ZDHHC2
GABRA4
ARNTL2
RAB20
MPZL2
MYL9
PTPRO
TIAM1
RAVER2
CAMP
KRT7
CCR6
CXorf40B
FABP3
CROCC
RECK
IGLV2-8
TEN1
CCDC39
TREML2
FBXO32
SYT12
TMEM129
RAB3A
RAB38
C8orf37
UACA
ZNF283
ZNF695
TC2N
ELF3
SASH1
GSTA4
UCK1
C9orf72
TGIF1
RELL2
RIMKLB
CHL1
TRIM61
SSX2IP
ATF7IP2
ZMYM1
PER3
ZNF222
IFT20
TBCEL
ZNF611
PINLYP
PYGL
HOOK2
ZNF773
GTDC1
CNKSR3
TESK2
ZNF689
FOXO4
RAB43
FAM188A
HOOK1
EFHA2
RFNG
LYRM5
ZNF844
N6AMT1
KAT2B
CDKL5
TAF4B
ZNF182
IGHV3-30
FBXL20
AMICA1
RIPK3
TMEM192
ABHD13
CCR2
TMEM45A
ZNF649
C17orf79
SLC25A44
CLUAP1
KLF3
PUS3
ALKBH2
SLC35B3
NDUFC2
ZNF280C
C5orf43
ZNF654
LAMTOR3
MTERFD1
KIAA1324L
RNF38
C1orf131
FGFR1OP2
MTBP
CENPK
CDK14
IGLC7
LYST
CCP110
PIP4K2C
GEMIN2
PARP8
FSD1L
NUF2
QKI
TTC27
DUSP11
NDUFAF4
SHOC2
AHR
TGS1
CD2AP
PLAA
TMEM33
KPNA1
PIK3R4
PHF6
NR3C1
TOP2B
HIF1A
PPIG
NOP58
RBM25
BCLAF1
IK
DNAJA1
DDX21
IGKV2-30
MS4A1

## Sheet: Sheet2
Outlier Gene IDs (ITP-high)
STRIP2
SFRP5
PRKAG2
CCDC142
SYCE2
TPST1
B3GNTL1
C11orf35
C11orf74
ARL17A
CAB39L
ZNF831
LRRC26
XKR8
GNG10
GRPR
IGHV3-13
ZNF23
MEGF9
NAPEPLD
TSPAN17
USP31
MAP3K13
NPR3
DUSP7
TMEM65
SERPINB2
CCM2L
FOXD2
SOWAHD
ADARB2
IGHV3-73
ZNF155
PRR7
SPSB2
CLGN
MAFF
IGKV3D-11
C8orf73
RNF10
ZNF286B
GALNTL4
FOXF1
SPOPL
EFNA5
FAM53B
IGKJ2
PCDHGA10
ACTBL2
CEBPA
PRDM8
SNTB1
IER5L
RTN4RL1
KCTD18
RASD1
NKX2-1
ZNF550
CRIP1
C1orf216
RP11-73E17.1
SLC2A4RG
KCNG2
NRG2
ZNF414
ATP5J2-PTCD1
LRP5
FAM127B
POU3F1
ACYP1
BLOC1S3
PKDCC
POU3F2
HOXC12
OTUD1
SP8
SKI
MEX3D
HOXD8
LURAP1L
VAT1L
FAM195A
NR2F1
POU3F3
FAM155A
UNKL
EN1
MAF
CCDC85C
ACER3
MAGI2
FZD8
FUOM
PPP1R3F
CHST14
C7orf43
TBC1D9
PCYOX1L
ZNF784
IGHJ6
FBXL12
EBF4
BOD1
GDF7
EMC6
MNX1
RMI2
DPM3
DOHH
UBN2
SOX1
SKIDA1
NKX2-3
COA3
C6orf223
GAA
IGHJ4
SIAH2
EOMES
COQ4
CXXC4
HMG20B
C9orf40
IFFO2
SPNS2
RUNDC1
EXOSC4
ZFHX3
PURA
CACNG8
HMX2
EXOSC6
TYSND1
HSBP1
PSMA6
DBP
VKORC1L1
ALKBH7
CYHR1
SPAG1
TIMM13
CDCA5
RUNX2
LSR
GBX1
FKBP1A
HPS6
PGRMC1
RXRB
HIGD2A
PLCXD1
ZNF296
SPIB
JUND
NOA1
PNPLA6
HEATR2
CLASRP
SCAND1
KLF2
TRAPPC12
RNASEH2C
ACTR1B
PLEC
MZT2B
LRRC47
HELZ2
PABPN1
TCF3
PPDPF
AC097381.1
VPS51
LRCH2
TBL3
NKX3-2
TCIRG1
CKAP4
SOX4
ZFP36
MBD2
CHCHD10
ATP5D
APRT
FAM100B
GPX1
RAB21
CKS2
GNB2
C19orf10
CYC1
TNFSF9
RPL39
HIST2H4A
PTPRCAP
IER2
TXNDC5
IGHV3-33
RPS29
CBX6
AC138647.1
UQCRC1
ALYREF
HIST2H2BF
DUSP2
HIST1H4F
OAZ1
H3F3A
HIST1H2AC
RPL41
HIST1H3J
GRN
RPL27A
MARCKS
HIST1H3D
HIST1H3H
MIF

## Sheet: Sheet3
# species: Homo sapiens
# support: EXP, IMP, ISS, ISM, TAS, IEA, HMP, HEP, IDA, IGI, ISO, IGC, NAS, HGI, IPI, IEP, ISA, RCA, IC, HDA
# associations retrieved on: 2019-05-31 15:27:10-04
# gofunc built on: 2018-02-21 10:04:34.764444-05
# gene associations file: ftp://ftp.geneontology.org/pub/go/gene-associations/goa_human.gaf.gz
# revision: 2018-02-02 $
# downloaded on: 2018-02-14 09:47:26-05
# GO DAG files from: http://archive.geneontology.org/latest-full/go_201512-termdb-tables.tar.gz
# downloaded on: 2015-12-22 05:43:21-05
# translation required: yes
# translation info:
# authority: ensembl
# synergizer db built on: 2015-11-17 14:24:21.26681-05
# synergizer db built from: Ensembl Genes 82 / Metazoa Mart / Plant Mart
# namespace: hgnc_symbol
# coverage: 99.8%
# size of "genespace": 9295
# number of attributes: 16843
# NOTE: these associations have been restricted to the genes included
# in the user-supplied gene space.
# NOTE: the last record consists of all the entities in the
# "genespace" that are not associated with any attribute (for
# the requested support).
# Original number of entities in query: 159
# Number of entities in query: 159
# Total number of entities: 9295
# Total number of attributes: 16843
# Original total number of attributes: 20270
# Translation required: yes
# Translation coverage: 0.997782
# Mode: unordered
# Number of simulations: 1000
# Adjusted P-value cutoff: 0.05
# Over/under: over
# Evidence codes: EXP, IMP, ISS, ISM, TAS, IEA, HMP, HEP, IDA, IGI, ISO, IGC, NAS, HGI, IPI, IEP, ISA, RCA, IC, HDA
OVERREPRESENTED ATTRIBUTES
N	X	LOD	P	P_adj	attrib ID	attrib name
7	34	1.21195	1.37009e-06	0.003	GO:0000183	chromatin silencing at rDNA
6	31	1.17985	1.17799e-05	0.019	GO:0000788	nuclear nucleosome
7	44	1.07678	8.45517e-06	0.016	GO:0006342	chromatin silencing
28	452	0.648184	2.28864e-09	<0.001	GO:0043565	sequence-specific DNA binding
18	309	0.598499	5.19563e-06	0.012	GO:0000981	RNA polymerase II transcription factor activity, sequence-specific DNA binding
19	344	0.574857	6.06448e-06	0.013	GO:1990837	sequence-specific double-stranded DNA binding
25	476	0.561955	4.54189e-07	0.001	GO:0001071	nucleic acid binding transcription factor activity
25	476	0.561955	4.54189e-07	0.001	GO:0003700	transcription factor activity, sequence-specific DNA binding
